# Supplementary material for: Quantitative measurement of IgG to SARS-CoV-2 proteins using ImmunoCAP
Source: bioRxiv or medRxiv preprint supplement (doi:10.1101/2020.11.09.20228411), 2020-11-12
Supplement: Supplementary file [file media-1.pdf]

## ONLINE SUPPLEMENT

**Suppl. Table 1.** Characteristics of COVID-19 cases

| Characteristics                                       |                  | COVID-19<br>Longitudinal cohort | COVID-19<br>Follow-up clinic* |
|-------------------------------------------------------|------------------|---------------------------------|-------------------------------|
| N                                                     |                  | 17                              | 36                            |
| Age. Median (IQR)                                     |                  | 65 (34-69)                      | 55 (48-66)                    |
| Sex                                                   | Male, n (%)      | 11 (65%)                        | 21 (58%)                      |
|                                                       | Female, n (%)    | 6 (35%)                         | 15 (42%)                      |
| Race/<br>ethnicity                                    | Caucasian, n (%) | 6 (35%)                         | 6 (17%)                       |
|                                                       | Black, n (%)     | 2 (12%)                         | 10 (28%)                      |
|                                                       | Hispanic, n (%)  | 9 (53%)                         | 18 (50%)                      |
| Received IVIG or plasma product, n (%)                |                  | 0 (0%)                          | 3 (8%)                        |
| Admitted to Intensive care unit, n (%)                |                  | 15 (88%)                        | 35 (97%)                      |
| On mechanical ventilation, n (%)                      |                  | 13 (76%)                        | 32 (89%)                      |
| Survived hospitalization, n (%)                       |                  | 14 (82%)                        | 36 (100%)                     |
| Time between blood draw and symptom onset, days (IQR) |                  | 12 (7-17)**                     | 70 (56-79)                    |

\*8 subjects were included in the longitudinal cohort and the follow-up clinic cohort.

\*\*Days between first recorded symptom and first blood draw

ONLINE SUPPLEMENT

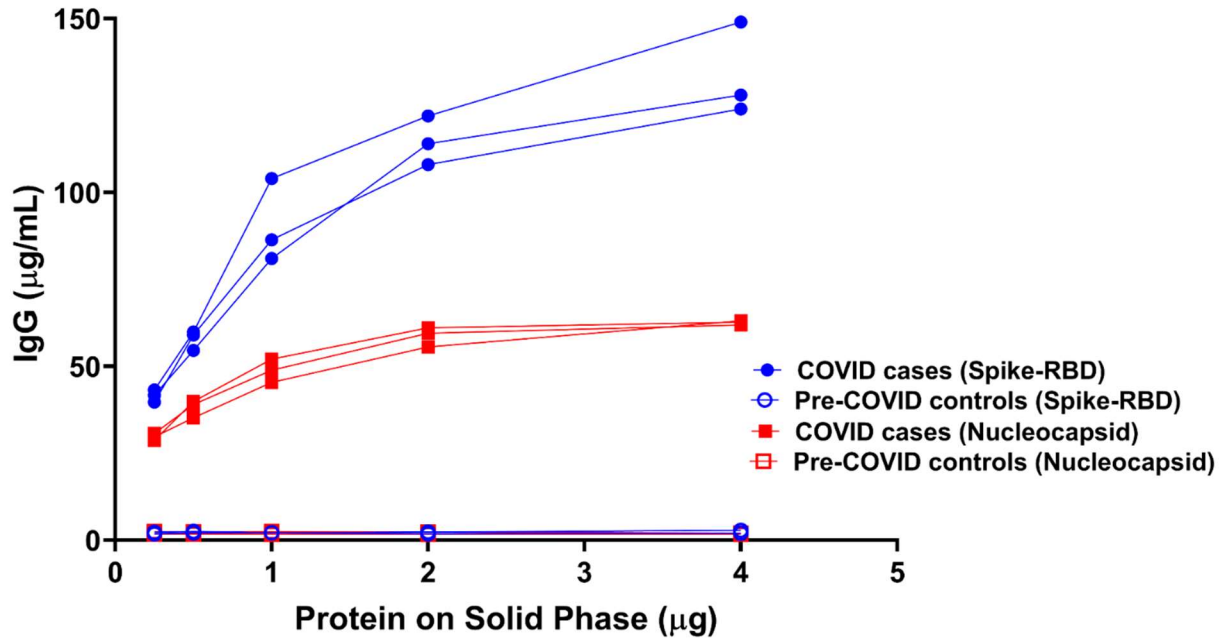

**Suppl. Fig. 1.** Measurement of IgG to SARS-CoV-2 spike-RBD and nucleocapsid using different amounts of viral antigen on the solid phase of the assay (N=3 patient samples).

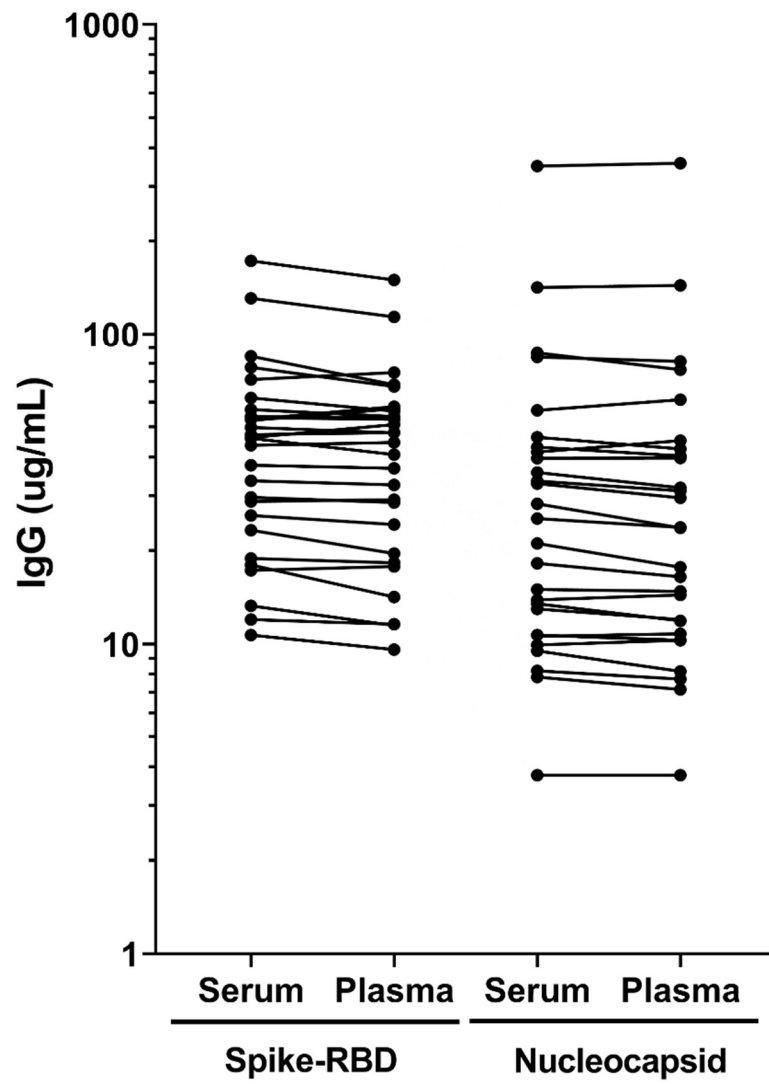

**Suppl. Fig. 2.** Comparison of IgG to SARS-CoV-2 spike-RBD and nucleocapsid using paired plasma and serum samples from COVID-19 patients (n=15).

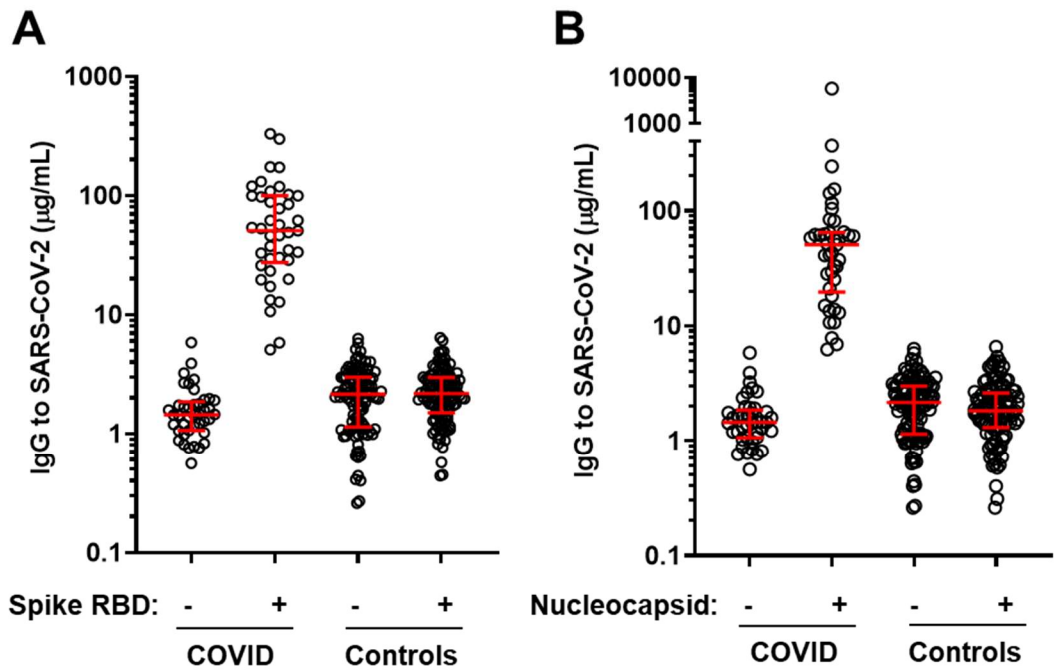

**Suppl. Fig. 3.** IgG to naked streptavidin ImmunoCAPs (-) or ImmunoCAPs carrying SARS-CoV-2 proteins (**A**, spike-RBD and **B**, nucleocapsid) on the solid-phase of samples from COVID-19 patients (n=41) or controls (n=109).

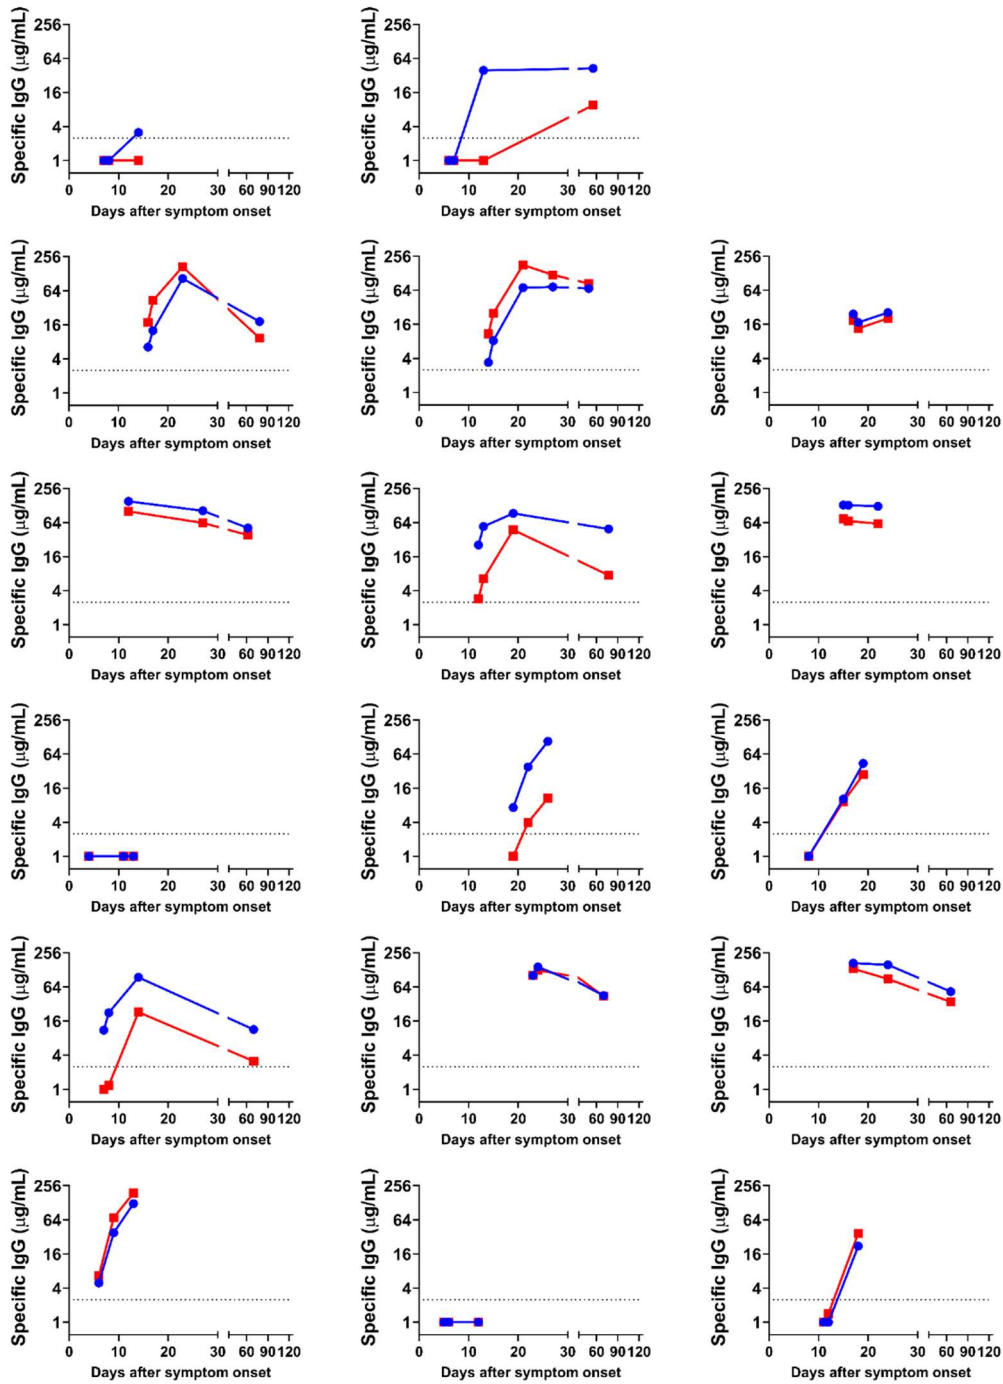

**Suppl. Fig. 4.** IgG to SARs-CoV-2 spike-RBD and nucleocapsid among 17 patients with severe COVID-19 who had longitudinal samples available.
